# Supplementary material
Source: Springer Nature journal article supplement (https://www.springermedizin.de/resource/supplementary/12889_2005_289_MOESM2_ESM.pdf/9500534)
Supplement: MOESM2 [file 9500534]

| <b>PAM quartile</b>  |
|----------------------|
| <b>1</b><br>inactive |
| <b>2</b><br>inactive |
| <b>3</b><br>active   |
| <b>4</b><br>active   |

**&**

| <b>AQUA quartile</b> |
|----------------------|
| <b>1</b><br>inactive |
| <b>2</b><br>inactive |
| <b>3</b><br>active   |
| <b>4</b><br>active   |

**=**

| <b>Combined score of<br/>PAM &amp; AQUA quartiles</b> |
|-------------------------------------------------------|
| <b>2-4</b><br>inactive                                |
| <b>5</b><br>inactive if AQUA = 2                      |
| <b>5</b><br>active if AQUA = 3                        |
| <b>6-8</b><br>active                                  |
